# Supplementary material
Source: PubMed Central journal article supplement (PMC4356779)
Supplement: AAC.04852-14_zac004153863so1.pdf [file AAC.04852-14_zac004153863so1.pdf]

## Supplemental data

**Table S1. Primers used in the study**

| Gene                            | Primer name | Sequence                        | Product size (bp) |
|---------------------------------|-------------|---------------------------------|-------------------|
| <i>hp0413</i>                   | HP0413-F    | 5'-AAACAATCTTTTTTCGTGGAA- 3'    | 395               |
|                                 | HP0413-R    | 3'-GAATAAGTAGGGATAAGTCG- 5'     |                   |
| <i>cag7</i> ( <i>hp0527</i> )   | HP0527-F1   | 5'-AGACTGCGTATCTCAAGCCA- 3'     | 432               |
|                                 | HP0527-R1   | 3'-GCTTTAACGCTTTCTTTAGCTA- 5'   |                   |
| <i>cag7</i> ( <i>hp0527</i> )   | HP0527-F2   | 5'-AGCAACAAGTGCTAGATTGT- 3'     | 830               |
|                                 | HP0527-R2   | 3'-TCTGTCGTTAGGATCGGCGT- 5'     |                   |
| <i>fixA</i> ( <i>hp0642</i> )   | HP0642-F    | 5'-TCTAGGTTGCTCAAATCAT- 3'      | 303               |
|                                 | HP0642-R    | 3'-AATAACTTCTGTCTTCCAGC- 5'     |                   |
| <i>rdxA</i> ( <i>hp0954</i> )   | HP0954-F    | 5'-ATTGCGGAATTTTACAGAGA- 3'     | 333               |
|                                 | HP0954-R    | 3'-CCTTATCAGTAACCATCACAAA- 5'   |                   |
| <i>rdxA</i> ( <i>hp0954</i> )*  | rdxF863     | 5'-TTAGGGATTTTATTGTATGCTA - 3'  | 686               |
|                                 | rdxR1544    | 3'-TTGATGCAATTACTTGGTTGTGA - 5' |                   |
| <i>rpsU</i> ( <i>hp0562</i> )   | HP0562-F    | 5'-ATGCCAGGGATTAAGGTTAG- 3'     | 210               |
|                                 | HP0562-R    | 3'-TAGTCTTGACTCATAACGCC- 5'     |                   |
| <i>rrnA16S</i> ( <i>hpr04</i> ) | HPr04-F     | 5'-AGGATGAAGGTTTTAGGATTG- 3'    | 1476              |
|                                 | HPr04-R     | 3'-TGTTCAATTAGATCCGAAAGA- 5'    |                   |
| <i>rrnB16S</i> ( <i>hpr07</i> ) | HPr07-F     | 5'-AGGATGAAGGTTTTAGGATTG- 3'    | 1603              |
|                                 | HPr07-R     | 3'-AAGAGCCTGACTTCAATCAA- 5'     |                   |

*cag7*, *cag* pathogenicity island protein *cag7*; *fixA*, NAD(P)H-flavin oxidoreductase; *rdxA*, oxygen-insensitive NAD(P)H nitroreductase; *rpsU*, 30S ribosomal protein S21.

\*: as described by Stephanie A. *et al*, 2003, J. Antimicro. Chemother.

**Table S2. Fourteen mutations in 7 genes found between 26695-1 and 26695-1MET**

| Genes                 | Positions | Mutation types | No. | Wild-Type | Mutation | 26695-1MET <sup>a</sup> | 26695-1 <sup>b</sup> |
|-----------------------|-----------|----------------|-----|-----------|----------|-------------------------|----------------------|
| <i>hp0413</i>         | 451       | SNP            | 1   | A         | -        | +                       | -                    |
| <i>cag7(hp0527)</i>   | 2299      | indel          | 10  | segment   | -        | +                       | -                    |
| <i>cag7(hp0527)</i>   | 3588      | indel          | 1   | -         | A        | +                       | -                    |
| <i>cag7(hp0527)</i>   | 2250      | SNP            | 1   | G         | A        | +                       | -                    |
| <i>cag7(hp0527)</i>   | 2313      | SNP            | 1   | T         | C        | +                       | -                    |
| <i>cag7(hp0527)</i>   | 2372      | SNP            | 1   | C         | T        | +                       | -                    |
| <i>cag7(hp0527)</i>   | 2377      | SNP            | 1   | G         | T        | +                       | -                    |
| <i>cag7(hp0527)</i>   | 3717      | SNP            | 1   | A         | G        | +                       | -                    |
| <i>cag7(hp0527)</i>   | 3721      | SNP            | 1   | A         | T        | +                       | -                    |
| <i>frxA(hp0642)</i>   | 571       | indel          | 2   | -         | TA       | +                       | -                    |
| <i>rdxA(hp0954)</i>   | 3         | SNP            | 1   | A         | G        | +                       | -                    |
| <i>rpsU(hp0562)</i>   | 37        | SNP            | 1   | G         | T        | +                       | -                    |
| <i>rrnA16S(hpr04)</i> | 871       | indel          | 3   | GTG       | -        | +                       | -                    |
| <i>rrnB16S(hpr07)</i> | 1142      | SNP            | 1   | A         | -        | +                       | -                    |

<sup>a</sup>, metronidazole-resistant strain.

<sup>b</sup>, wild-type 26695 strain.

(+): mutations or deletions occurred.

(-), no mutations or deletions occurred.
